# NEW TITLES FROM AMERICAN PSYCHIATRIC ASSOCIATION PUBLISHING

## Pocket Guide to Emergent and Serious Adverse Events in Psychopharmacology

Edited by Richard Balon, M.D., and Mary K. Morreale, M.D.

2023 • 236 pages • ISBN 978-1-61537-453-3 • Paperback  
\$61.00 • Item #37453  
2023 • 236 pages • ISBN 978-1-61537-454-0 • eBook  
\$48.95 • Item #37454

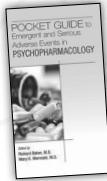

## Loneliness Science and Practice

Edited by Dilip V. Jeste, M.D., Tanya T. Nguyen, Ph.D., and  
Nancy J. Donovan, M.D.

2023 • 264 pages • ISBN 978-1-61537-422-9 • Paperback  
\$53.00 • Item #37422  
2023 • 264 pages • ISBN 978-1-61537-423-6 • eBook  
\$42.50 • Item #37423

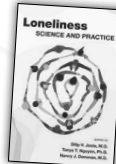

## The Role of Companion Animals in the Treatment of Mental Disorders

Edited by Nancy R. Gee, Ph.D.,  
Lisa Townsend, LCSW-C, Ph.D., and  
Robert L. Findling, M.D., M.B.A.

2023 • 314 pages • ISBN 978-1-61537-455-7 • Paperback  
\$55.00 • Item #37455  
2023 • 314 pages • ISBN 978-1-61537-456-4 • eBook  
\$44.00 • Item #37456

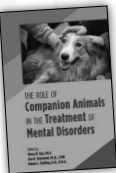

## Psychotherapy in Corrections A Supportive Approach

Peter N. Novalis, M.D., Ph.D., Virginia Singer, DNP, and  
Carol M. Novalis, M.A.

2023 • 536 pages • ISBN 978-1-61537-332-1 • Paperback  
\$89.00 • Item #37332  
2023 • 536 pages • ISBN 978-1-61537-432-8 • eBook  
\$71.00 • Item #37432

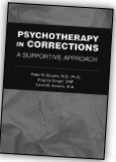

## Facing Campus Sexual Assault and Relationship Violence With Courage

A Guide for Institutions and Clinicians on  
Prevention, Support, and Healing

Edited by Helen W. Wilson, Ph.D., and  
Christina T. Khan M.D., Ph.D.

2023 • 255 pages • ISBN 978-1-61537-443-4 • Paperback  
\$54.00 • Item #37443  
2023 • 255 pages • ISBN 978-1-61537-444-1 • eBook  
\$43.00 • Item #37444

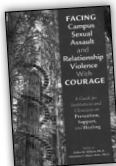

## The Object Relations Lens A Psychodynamic Framework for the Beginning Therapist

Christopher W.T. Miller, M.D.

2023 • 252 pages • ISBN 978-1-61537-428-1 • Paperback  
\$52.00 • Item #37428  
2023 • 252 pages • ISBN 978-1-61537-429-8 • eBook  
\$42.00 • Item #37429

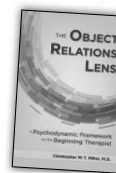

AMERICAN  
PSYCHIATRIC  
ASSOCIATION  
PUBLISHING

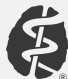

ORDER @ [www.appi.org](http://www.appi.org)  
Email: [appi@psych.org](mailto:appi@psych.org)  
Toll Free: 1-800-368-5777

20% Discount for American Psychiatric  
Association Members  
25% Discount for APA Resident-Fellow Members

AH2318A

### Statement of Ownership, Management, and Circulation (All Periodicals Publications Except Requester Publications)

| PS Form 3526                                                                                                                                                                                                                                                                                                                                                                                                                                                                                                                                                            |                                                                     |                                           |                                                             |
|-------------------------------------------------------------------------------------------------------------------------------------------------------------------------------------------------------------------------------------------------------------------------------------------------------------------------------------------------------------------------------------------------------------------------------------------------------------------------------------------------------------------------------------------------------------------------|---------------------------------------------------------------------|-------------------------------------------|-------------------------------------------------------------|
| 1. Publication Title<br>AMERICAN PSYCHIATRIC PUBLISHING INC/<br>FOCUS                                                                                                                                                                                                                                                                                                                                                                                                                                                                                                   | 2. Publication Number<br>21577                                      | ISSN<br>15414094                          | 3. Filing Date<br>08/05/2024                                |
| 4. Issue Frequency<br>QUARTERLY                                                                                                                                                                                                                                                                                                                                                                                                                                                                                                                                         | 5. Number of Issues Published Annually<br>4                         | 6. Annual Subscription Price<br>\$ 446.00 |                                                             |
| 7. Complete Mailing Address of Known Office of Publication<br>800 MAINE AVE SW STE 900<br>WASHINGTON, WASHINGTON DC, DC 20024-2812                                                                                                                                                                                                                                                                                                                                                                                                                                      |                                                                     |                                           | Contact Person<br>BRIAN COLE<br>Telephone<br>(202) 459-9750 |
| 8. Complete Mailing Address of Headquarters or General Business Office of Publisher<br>800 MAINE AVE SW STE 900<br>WASHINGTON, DC 20024-2812                                                                                                                                                                                                                                                                                                                                                                                                                            |                                                                     |                                           |                                                             |
| 9. Full Names and Complete Mailing Addresses of Publisher, Editor, and Managing Editor                                                                                                                                                                                                                                                                                                                                                                                                                                                                                  |                                                                     |                                           |                                                             |
| Publisher (Name and complete mailing address)<br>SIMONE TAYLOR<br>800 MAINE AVE SW STE 900<br>WASHINGTON, DC 20024-2812                                                                                                                                                                                                                                                                                                                                                                                                                                                 |                                                                     |                                           |                                                             |
| Editor (Name and complete mailing address)<br>MARK RAPAPORT<br>800 MAINE AVE SW STE 900<br>WASHINGTON, DC 20024-2812                                                                                                                                                                                                                                                                                                                                                                                                                                                    |                                                                     |                                           |                                                             |
| Managing Editor (Name and complete mailing address)<br>DEMARIE JACKSON<br>800 MAINE AVE SW STE 900<br>WASHINGTON, DC 20024-2812                                                                                                                                                                                                                                                                                                                                                                                                                                         |                                                                     |                                           |                                                             |
| 10. Owner (Do not leave blank. If the publication is owned by a corporation, give the name and address of the corporation immediately followed by the names and addresses of all stockholders owning or holding 1 percent or more of the total amount of stock. If not owned by a corporation, give names and addresses of the individual owners. If owned by a partnership or other unincorporated firm, give its name and address as well as those of each individual owner. If the publication is published by a nonprofit organization, give its name and address.) |                                                                     |                                           |                                                             |
| Full Name<br>AMERICAN PSYCHIATRIC ASSN                                                                                                                                                                                                                                                                                                                                                                                                                                                                                                                                  | Complete Mailing Address<br>800 MAINE AVE SW STE 900, DC 20024-2812 |                                           |                                                             |
| 11. Known Bondholders, Mortgagees, and Other Security Holders Owning or Holding 1 Percent or More of Total Amount of Bonds, Mortgages, or Other Securities. If none, check box <input checked="" type="checkbox"/> None                                                                                                                                                                                                                                                                                                                                                 |                                                                     |                                           |                                                             |
| Full Name                                                                                                                                                                                                                                                                                                                                                                                                                                                                                                                                                               | Complete Mailing Address                                            |                                           |                                                             |
| PS Form 3526, September 2007 (Page 1) <span style="float: right;">PRIVACY NOTICE: See our privacy policy on <a href="http://www.usps.com">www.usps.com</a></span>                                                                                                                                                                                                                                                                                                                                                                                                       |                                                                     |                                           |                                                             |

|                                                                                                                                                                                                                                                                                                                                                        |                                                                                                                                                                    |                                                             |                                                                |
|--------------------------------------------------------------------------------------------------------------------------------------------------------------------------------------------------------------------------------------------------------------------------------------------------------------------------------------------------------|--------------------------------------------------------------------------------------------------------------------------------------------------------------------|-------------------------------------------------------------|----------------------------------------------------------------|
| 13. Publication Title<br>AMERICAN PSYCHIATRIC PUBLISHING INC/FOCUS                                                                                                                                                                                                                                                                                     |                                                                                                                                                                    | 14. Issue Date for Circulation Data Below<br>07/15/2024     |                                                                |
| 15. Extend and Nature of Circulation                                                                                                                                                                                                                                                                                                                   |                                                                                                                                                                    | Average No. Copies Each Issue<br>During Preceding 12 Months | No. Copies of Single Issue<br>Published Nearest to Filing Date |
| a. Total Numbers of Copies (Net press run)                                                                                                                                                                                                                                                                                                             |                                                                                                                                                                    | 1424                                                        | 1224                                                           |
| b. Paid Circulation (By Mail and Outside the Mail)                                                                                                                                                                                                                                                                                                     | (1) Mailed Outside County Paid Subscriptions Stated on PS Form 3541 (include paid distribution above nominal rate, advertiser's proof copies, and exchange copies) | 875                                                         | 901                                                            |
|                                                                                                                                                                                                                                                                                                                                                        | (2) Mailed In-County Paid Subscriptions Stated on PS Form 3541 (include paid distribution above nominal rate, advertiser's proof copies, and exchange copies)      | 0                                                           | 0                                                              |
|                                                                                                                                                                                                                                                                                                                                                        | (3) Paid Distribution Outside the Mails Including Sales Through Dealers and Carriers, Street Vendors, Counter Sales, and Other Paid Distribution Outside USPS      | 0                                                           | 0                                                              |
|                                                                                                                                                                                                                                                                                                                                                        | (4) Paid Distribution by Other Classes of Mail Through the USPS (e.g. First-Class Mail)                                                                            | 0                                                           | 0                                                              |
| c. Total Paid Distribution (Sum of 15b (1), (2), (3), (4))                                                                                                                                                                                                                                                                                             |                                                                                                                                                                    | 875                                                         | 901                                                            |
| d. Free or Nominal Rate Distribution (By Mail and Outside the Mail)                                                                                                                                                                                                                                                                                    | (1) Free or Nominal Rate Outside County Copies included on PS Form 3541                                                                                            | 0                                                           | 0                                                              |
|                                                                                                                                                                                                                                                                                                                                                        | (2) Free or Nominal Rate In-County Copies included on PS Form 3541                                                                                                 | 0                                                           | 0                                                              |
|                                                                                                                                                                                                                                                                                                                                                        | (3) Free or Nominal Rate Copies Mailed at Other Classes Through the USPS (e.g. First-Class Mail)                                                                   | 0                                                           | 0                                                              |
|                                                                                                                                                                                                                                                                                                                                                        | (4) Free or Nominal Rate Distribution Outside the Mail (Carriers or other means)                                                                                   | 175                                                         | 50                                                             |
| e. Total Free or Nominal Rate Distribution (Sum of 15d (1), (2), (3), (4))                                                                                                                                                                                                                                                                             |                                                                                                                                                                    | 175                                                         | 50                                                             |
| f. Total Distribution (Sum of 15c and 15e)                                                                                                                                                                                                                                                                                                             |                                                                                                                                                                    | 1050                                                        | 951                                                            |
| g. Copies not Distributed                                                                                                                                                                                                                                                                                                                              |                                                                                                                                                                    | 0                                                           | 0                                                              |
| h. Total (Sum of 15f and 15g)                                                                                                                                                                                                                                                                                                                          |                                                                                                                                                                    | 1050                                                        | 951                                                            |
| i. Percent Paid ((15c / 15f) times 100)                                                                                                                                                                                                                                                                                                                |                                                                                                                                                                    | 83.33 %                                                     | 94.74 %                                                        |
| 16. If total circulation includes electronic copies, report that circulation on lines below.                                                                                                                                                                                                                                                           |                                                                                                                                                                    |                                                             |                                                                |
| a. Paid Electronic Copies                                                                                                                                                                                                                                                                                                                              |                                                                                                                                                                    | 0                                                           | 0                                                              |
| b. Total Paid Print Copies (Line 15c) + Paid Electronic Copies                                                                                                                                                                                                                                                                                         |                                                                                                                                                                    | 0                                                           | 0                                                              |
| c. Total Print Distribution (Line 15f) + Paid Electronic Copies                                                                                                                                                                                                                                                                                        |                                                                                                                                                                    | 0                                                           | 0                                                              |
| d. Percent Paid (Both Print and Electronic Copies)                                                                                                                                                                                                                                                                                                     |                                                                                                                                                                    | 0.00 %                                                      | 0.00 %                                                         |
| 18. Signature and Title of Editor, Publisher, Business Manager, or Owner<br>Brian Cole                                                                                                                                                                                                                                                                 |                                                                                                                                                                    | Title<br>Publishing Operations Manager                      | Date<br>09/05/2024 13:15:54 PM                                 |
| I certify that all information furnished on this form is true and complete. I understand that anyone who furnishes false or misleading information on this form or who omits material or information requested on the form may be subject to criminal sanctions (including fines and imprisonment) and/or civil sanctions (including civil penalties). |                                                                                                                                                                    |                                                             |                                                                |
| PS Form 3526, September 2007 (Page 2) <span style="float: right;">PRIVACY NOTICE: See our privacy policy on <a href="http://www.usps.com">www.usps.com</a></span>                                                                                                                                                                                      |                                                                                                                                                                    |                                                             |                                                                |



Searching for  
the perfect  
psychiatric  
career?

## Let APA JobCentral help!

### Manage Your Career

- Browse hundreds of active job listings!
- Create an account to save jobs, store multiple resumes and cover letters and communicate with employers through our internal messaging system.
- Set up multiple job alerts specifying your skills, interests and location to receive e-mails when employers post jobs that match your criteria.

### Recruit for Open Positions

- Post your job in front of thousands of highly qualified psychiatrists.
- Cross promote your job listing in Psychiatric News.
- Search the anonymous resume database to find your ideal candidate.

AMERICAN  
PSYCHIATRIC  
ASSOCIATION

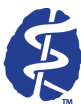

**JOBCENTRAL**  
The Career Hub for Psychiatry

[jobs.psychiatry.org](https://jobs.psychiatry.org)
