FALL 2024 | VOLUME 22 | NUMBER 4

# Focus

The Journal of Lifelong Learning in Psychiatry

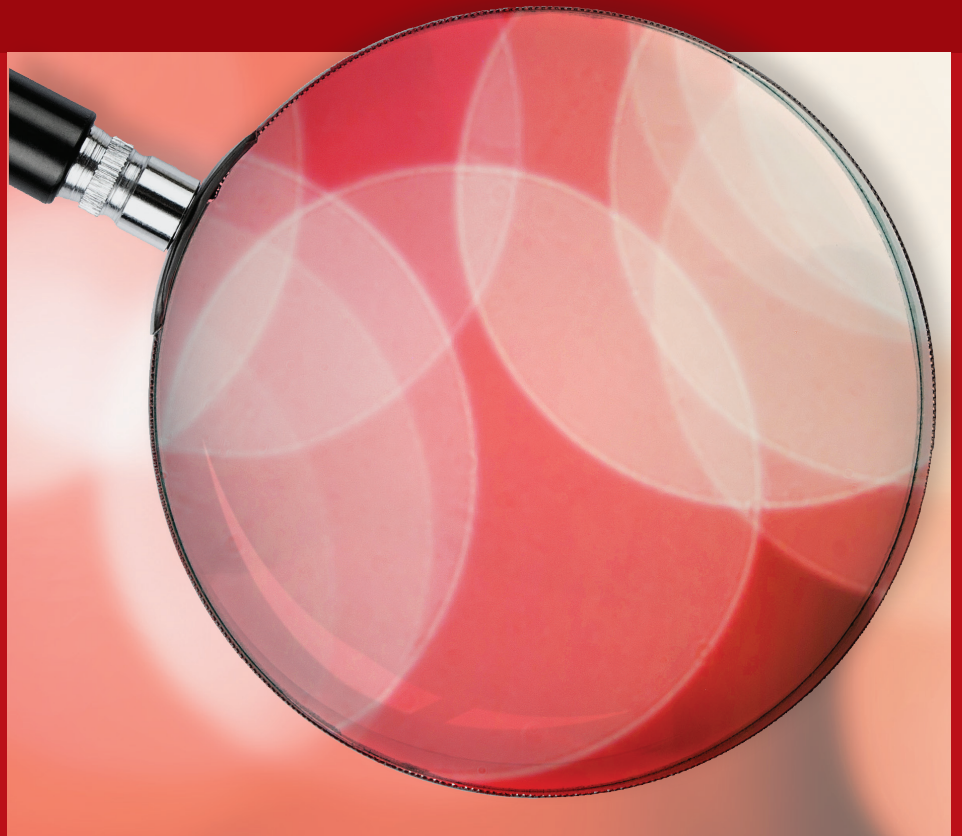

## Substance Use Disorders: Population Prevention

Guest Editor: Katia Delrahim Howlett, Ph.D., M.B.A.
