# Focus

The Journal of Lifelong Learning in Psychiatry

## The Best Resource for

- Clinical Synthesis
- Expert Guidance
- Lifelong Learning
- Maintenance of Certification

**Focus**, APA's quarterly clinical review journal, is designed for practicing psychiatrists to keep abreast of significant clinical knowledge and advances in the field through self-directed lifelong learning. Four issues each year provide comprehensive reviews of major clinical areas of psychiatry. **Focus** also provides an organized learning and self-assessment program with 44 hours of CME each year.

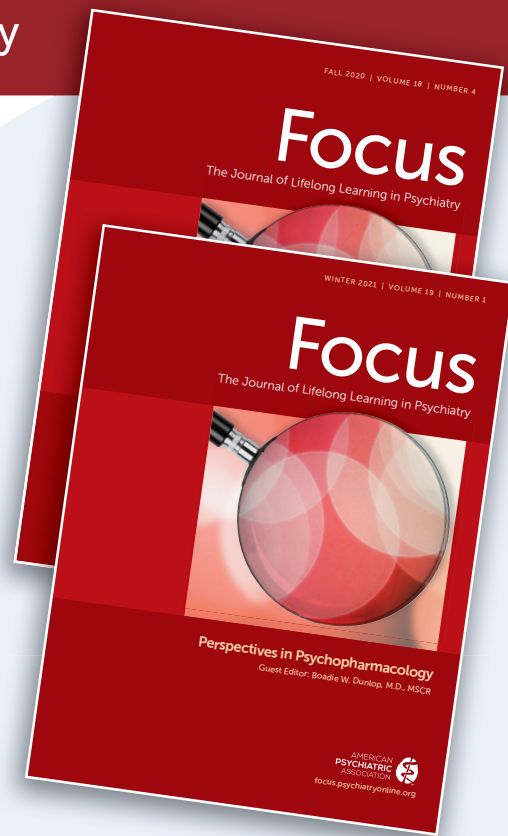

## An Annual Subscription to Focus Gives You:

- Reviews of core areas in psychiatry, with each issue overseen by a Guest Editor clinical expert in that area.
- Articles on best practices, new developments and the current state of practice.
- Quizzes that allow you to earn up to five *AMA PRA Category 1 Credits*™ by completing CME questions for each issue—for a total of up to 20 CME credits per year.
- An annual 120-question **self-assessment exam** for an additional 24 CME credits and APBN MOC self-assessment credits that provides you with a comparison of your result against the group score of your peers.
- Online access to back issues (CME credits for issue quizzes available only for your subscription year).

[focus.psychiatryonline.org](http://focus.psychiatryonline.org)

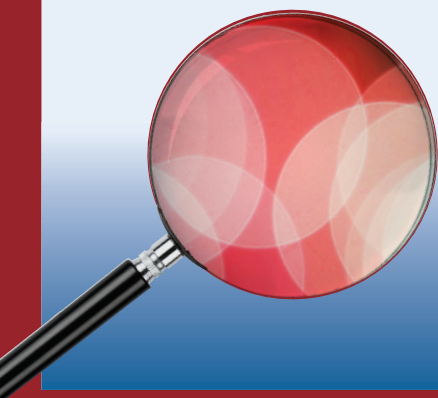

AMERICAN  
PSYCHIATRIC  
ASSOCIATION  
PUBLISHING

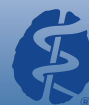

[www.appi.org](http://www.appi.org)  
1-800-368-5777  
[appi@psych.org](mailto:appi@psych.org)

Priority Code AH2126A

# PSYCHIATRYonline

Your Destination for Lifelong Learning in Psychiatry

The one-stop resource for information on diagnosis, treatment, guidelines, the latest research, and breaking news from the field.

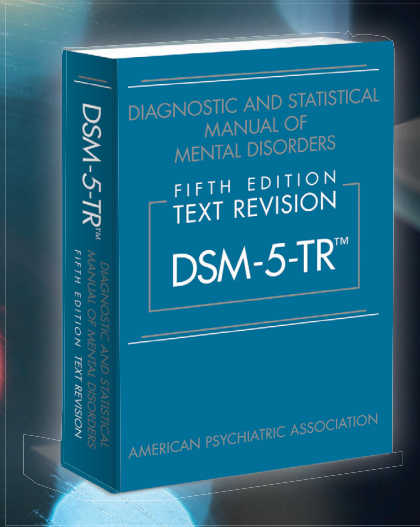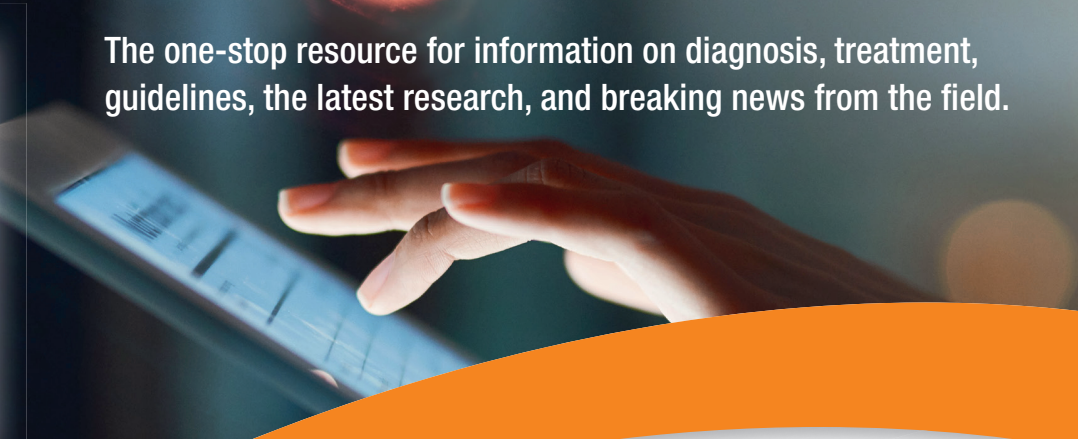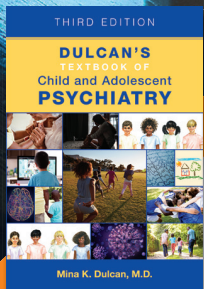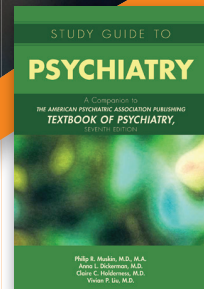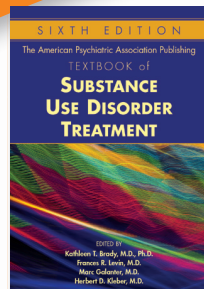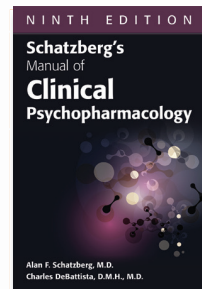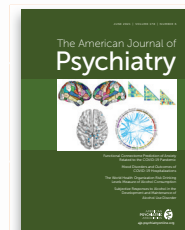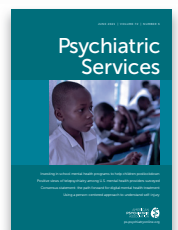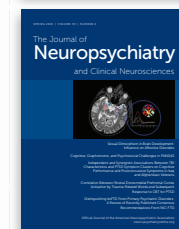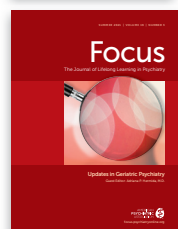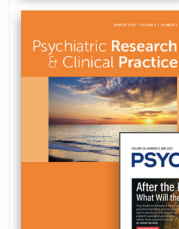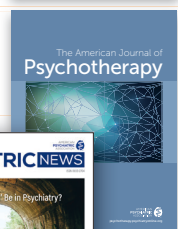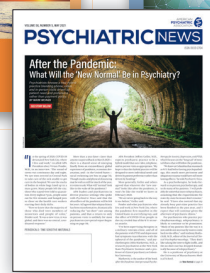

**PsychiatryOnline.org** is the platform for all American Psychiatric Association Publishing journals, *DSM-5-TR™*, and bestselling textbooks, as well as APA Practice Guidelines, and continuing medical education.

This is a one-stop resource for information on psychiatric diagnosis, treatment, guidelines, the latest research, and breaking news from the field. From a single location, users can search across all books and journals to find the most relevant content easier than ever.

Subscribe to products individually or to the DSM Select package that includes the DSM-5® library, books and select journals.

**Go to [www.appi.org](http://www.appi.org) to subscribe.**

*Institutional subscription options are available.*

*For more information contact: [institutions@psych.org](mailto:institutions@psych.org);  
800-368-5777 ext. 3729*

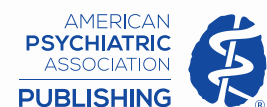

[psychiatryonline.org](http://psychiatryonline.org)

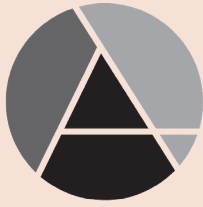

JOINTLY ACCREDITED PROVIDER

INTERPROFESSIONAL CONTINUING EDUCATION

**Editor and Advisor Program Planner Disclosure Listing for *Focus* Editor in Chief:**

Mark H. Rapaport, M.D., has no relevant financial relationships to disclose.

**Editor and Advisor Program Planner Disclosure Listing for *Focus* Self-Assessment Editors, Associate Editors, Editorial Boards, and staff:**

Boadie Dunlop, M.D., grant/research funding from Compass Pathways, Otsuka, Aptinyx, Acadia; consultant at Myriad Neuroscience, Sage Therapeutics, Otsuka Pharmaceutical, Greenwich Biosciences. James L. Knoll IV, M.D., annual honorarium as a member of the teaching faculty for the annual AAPL forensic psychiatry board review course. Raymond Lam, M.D., consultant: Allergan, Asia-Pacific Economic Cooperation, Canadian Network for Mood and Anxiety Treatments, Janssen, Lundbeck, Myriad Neuroscience, Otsuka, Pfizer; ad hoc speaking honoraria: Canadian Network for Mood and Anxiety Treatments, Canadian Psychiatric Association, Hansoh, Lundbeck, Lundbeck Institute, Pfizer; grant/research funding from BC Leading Edge Endowment Fund, Canadian Institutes of Health Research, Canadian Network for Mood and Anxiety Treatments, Healthy Minds Canada, Janssen, Lundbeck, Michael Smith Foundation for Health Research, MITACS, Ontario Brain Institute, St. Jude Medical, University Health Network Foundation, VGH-UBCH Foundation; book royalties: Cambridge University Press, Informa Press, Oxford University Press; copyright: Lam Employment Absence and Productivity Scale (LEAPS). Vishal Madaan, M.D., grant/research funding from Allergan, Boehringer-Ingelheim, Neurocrine, Otsuka, Pfizer, Shire, Supernus. David Mischoulon, M.D., Ph.D., employed part time, MGH Clinical Trials Network and Institute (CTNI), which has received research funding from multiple pharmaceutical companies and NIMH; grant/research funding from Nordic Naturals (donated omega-3 fatty acid medication and placebo for clinical trial) and heckel medizintechnik GmbH (supplied whole body hyperthermia device for clinical trial). Francisco A. Moreno, M.D., Liva Nova: DSMB chair. Sidney Zisook, M.D., grant/research funding from COMPASS Pathways.

**Editors and Members of the Editorial Boards of *Focus* and the *Focus* Self-Assessment and staff listed below report no disclosures:**

Jacob M. Appel, M.D., J.D., Richard Balon, M.D., Carol A. Bernstein, M.D., Kathleen T. Brady, M.D., Peter F. Buckley, M.D., Ph.D., Paul J. Carlson, M.D., Josepha A. Cheong, M.D., Peyton Fultz, Glen O. Gabbard, M.D., Vikas Gupta, M.D., Asmara T. Hoo-Cardiel, D.O., Paresh Atu Jaini, D.O., Venkata Kolli, M.B.B.S., Sherrell T. Lam, M.D., Ira M. Lesser, M.D., Avram H. Mack, M.D., Philip R. Muskin, M.D., Michele T. Pato, M.D., M.P.H., Lorena Reyna, M.D., Victor I. Reus, M.D., Dorothy E. Stubbe, M.D., Yi-lang Tang, M.D., Ph.D., John Teshima, M.D., M.Ed., James W. Thompson, M.D., M.P.H., Marcia L. Verduin, M.D., Joel Yager, M.D.

# Focus

The Journal of Lifelong Learning in Psychiatry

"Lifelong Learning in Psychiatry" is an evolving series of educational initiatives developed by the American Psychiatric Association to meet the changing needs of psychiatrists for the 21st century. *Focus* offers clinical reviews and original research for practicing psychiatrists to keep abreast of significant advances in the field. Developed as part of APA's "Lifelong Learning in Psychiatry" series—educational initiatives to meet the changing needs of psychiatrists for the 21st century—*Focus* has as its goal the dissemination of up-to-date information while facilitating lifelong study skills and critical self-assessment for improving patient care and preparation for continuing certification. Each issue is designed as a personal study resource with particular attention to clinical practice and offers opportunities to earn *AMA PRA Category 1 Credit*<sup>™</sup>.

## Educational Objectives

*Focus* is designed as a personal study resource to help practicing psychiatrists keep abreast of significant advances in the field, with particular attention to clinical practice.

With each issue, participants review current knowledge, recognize gaps in learning, and increase their understanding of an important topic in the field of psychiatry.

Participants also can prepare for an annual self-assessment designed to aid the physician in addressing areas where more study is needed to enhance management of patients.

## To Earn Continuing Medical Education Credit

Each issue, prepared by distinguished faculty who are recognized leaders in their fields, incorporates a CME component. To earn CME credit for *Focus*, subscribers should read through the material presented in each issue. After reading the material, complete the CME Quiz and course evaluation online and earn credit with a passing score of 60%.

## Accreditation and Designation

In support of improving patient care, the American Psychiatric Association is jointly accredited by the Accreditation Council for Continuing Medical Education (ACCME), the Accreditation Council for Pharmacy Education (ACPE), and the American Nurses Credentialing Center (ANCC), to provide continuing education for the healthcare team.

The APA designates this enduring activity for a maximum of 5 *AMA PRA Category 1 Credits*<sup>™</sup>. Physicians should claim only the credit commensurate with the extent of their participation in the activity.

Neither the American Psychiatric Association nor American Psychiatric Association Publishing holds itself responsible for statements made in its publications by contributors. Unless so stated, material in *Focus* does not reflect the endorsement, official attitude, or position of the American Psychiatric Association, American Psychiatric Association Publishing, or the journal's Editorial Board.

Material published in the journals of the American Psychiatric Association is protected by copyright and all rights are reserved. Material may not be reproduced in any form or by any means without written permission from the copyright owner. For permission to reproduce material from American Psychiatric Association journals, please visit [www.appi.org/CustomerService/Pages/Permissions.aspx](http://www.appi.org/CustomerService/Pages/Permissions.aspx) for more information. Permission can also be secured through the Copyright Clearance Center ([www.copyright.com](http://www.copyright.com)). For bulk reprints, please contact [permissions@psych.org](mailto:permissions@psych.org).

This consent does not extend to other kinds of copying, such as copying for general distribution, for advertising or promotional purposes, for creating new collective works, or for resale. Permission need not be obtained for photocopying isolated articles for nonprofit classroom or library reserve use; all fees associated with such permission are waived.

## American Board of Psychiatry and Neurology

The American Board of Psychiatry and Neurology has reviewed *Focus: The Journal of Lifelong Learning in Psychiatry* and the *Focus Self-Assessment Examination* and has approved this program as part of a comprehensive lifelong learning and self-assessment program, which is mandated by the American Board of Medical Specialties as a necessary component of continuing certification.

## Royal College of Physicians and Surgeons of Canada

The *Focus* Self-Assessment is an Accredited Self-Assessment Program (Section 3) as defined by the Maintenance of Certification Program of the Royal College of Physicians and Surgeons of Canada, and was approved by the Canadian Psychiatric Association. You may claim a maximum of 24 hours (credits are automatically calculated).

The specific opinions and content of this event are not necessarily those of the CPA, and are the responsibility of the organizer(s) alone.



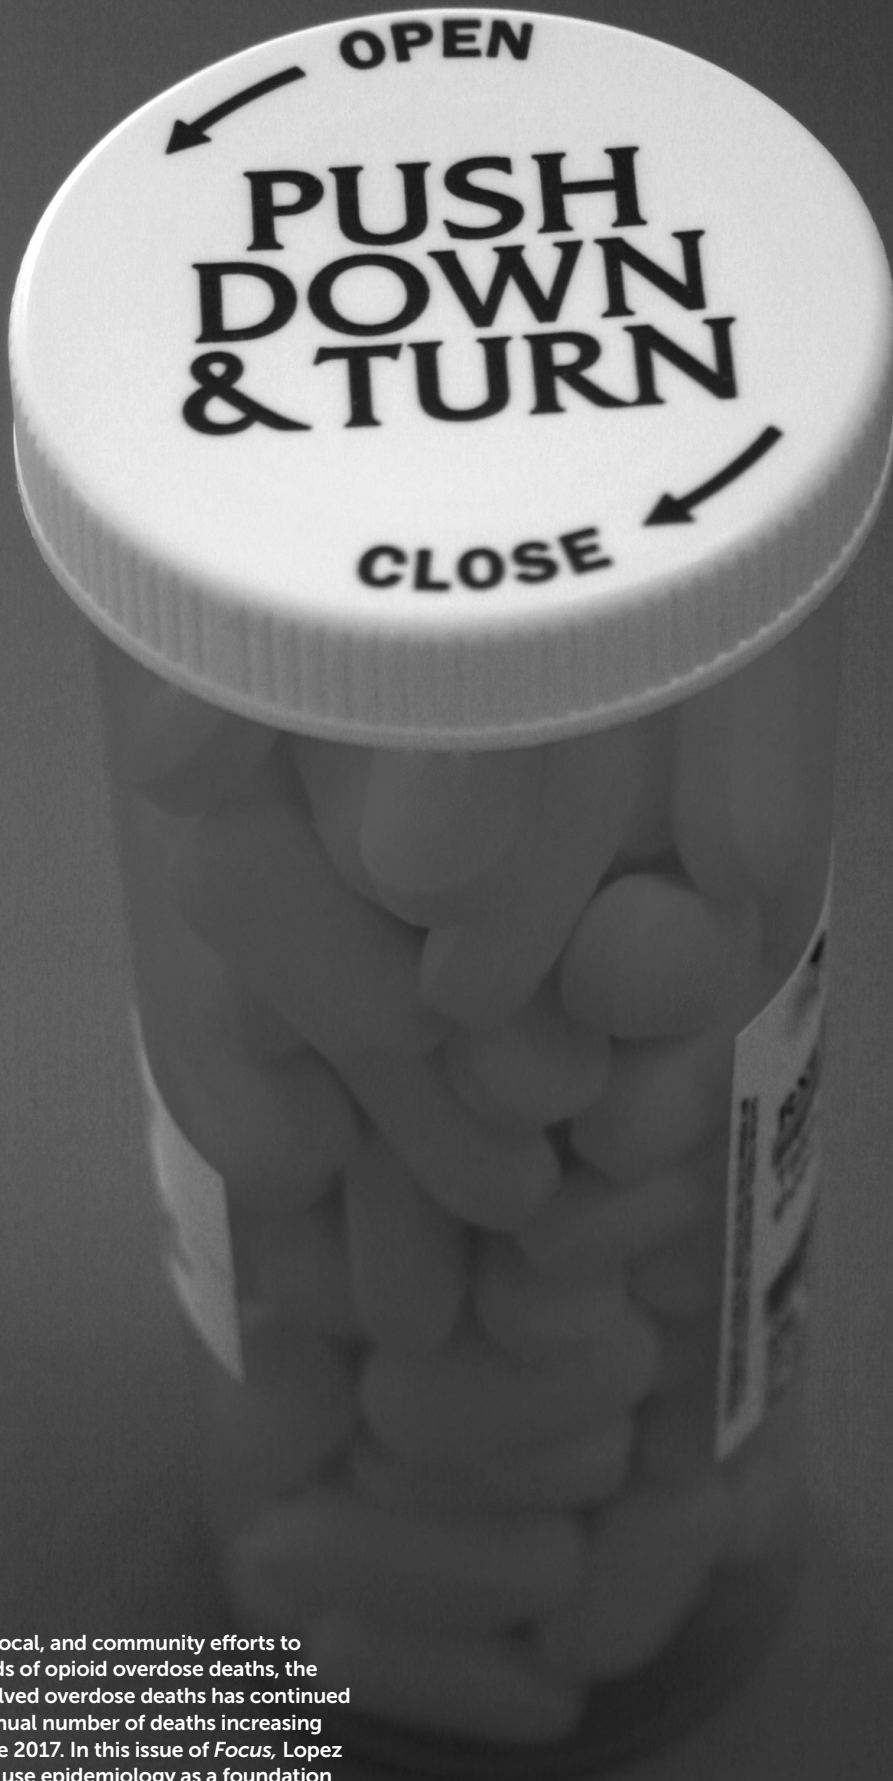

Despite federal, state, local, and community efforts to reverse increased trends of opioid overdose deaths, the number of opioid-involved overdose deaths has continued to worsen, with the annual number of deaths increasing by more than 70% since 2017. In this issue of *Focus*, Lopez et al. review substance use epidemiology as a foundation for prevention. (Photo: ftwitty, via iStock)
